# Supplementary material for: Molecular and Genomic Insights of mcr-1-Producing Escherichia coli Isolates from Piglets
Source: MDPI journal article supplement (doi:10.3390/antibiotics11020157), 2022-01-26
Supplement: s1 [file s1]

Supplementary Table S1. Genomic features of *E. coli* isolates.

| Genome | Contigs | Genome Length<br>(bp) | G-C content<br>(%) | Coding Sequence<br>(CDS) | tRNA |
|--------|---------|-----------------------|--------------------|--------------------------|------|
| C072   | 115     | 5168708               | 50.37              | 4913                     | 59   |
| C2033  | 107     | 5243891               | 50.31              | 4920                     | 63   |
| C2-107 | 147     | 5086635               | 50.50              | 4954                     | 63   |
| C2-108 | 139     | 5042928               | 50.52              | 4890                     | 57   |

Supplementary Table S2. Resistome of colistin-resistant *E. coli* isolates.

| Antibiotics family                 | Isolates and antibiotic resistance genes <sup>a</sup>                        |                                                           |                                                       |                                                       |                                                                    |
|------------------------------------|------------------------------------------------------------------------------|-----------------------------------------------------------|-------------------------------------------------------|-------------------------------------------------------|--------------------------------------------------------------------|
|                                    | C072                                                                         | C2033                                                     | C2-107                                                | C2-108                                                | RC2-007                                                            |
| <b>Aminoglycosides</b>             | <i>aac(3)-IV, aadA2, aadA5, aph(4)-Ia, aph(6)-Id aph(3'')-Ib, aph(3')-Ia</i> | <i>aac(3)-IV, aaC2-II-d, aadA2, aph(4)-Ia, aph(3')-Ia</i> | <i>aph(4)-Ia, aac(3)-IV, aph(3')-Ia, aadA2, aadA1</i> | <i>aph(4)-Ia, aac(3)-IV, aph(3')-Ia, aadA2, aadA1</i> | <i>aac(3)-IIa, aadA5, aph(3'')-Ib, aph(6)-Id</i>                   |
| <b>Tetracyclines</b>               | <i>tetB</i>                                                                  | <i>tetB</i>                                               | -                                                     | -                                                     | <i>tetB</i>                                                        |
| <b>Florfenicol/chloramphenicol</b> | <i>cat, cmlA1, floR</i>                                                      | <i>cmlA1, floR</i>                                        | <i>cmlA1, floR</i>                                    | <i>cmlA1, floR</i>                                    | <i>cat, floR</i>                                                   |
| <b>Trimethoprim</b>                | <i>dfrA17</i>                                                                | <i>dfrA17</i>                                             | -                                                     | -                                                     | <i>dfrA17</i>                                                      |
| <b>Fosfomycin</b>                  | <i>fosA3</i>                                                                 | <i>fosA3</i>                                              | <i>fosA3</i>                                          | <i>fosA3</i>                                          | -                                                                  |
| <b>Macrolides</b>                  | <i>mphA</i>                                                                  | <i>mphA</i>                                               | <i>mphA, mdx(A)</i>                                   | <i>mphA, mdx(A)</i>                                   | <i>mphA</i>                                                        |
| <b>Sulfonamides</b>                | <i>sul3</i>                                                                  | <i>sul2, sul3</i>                                         | <i>sul2, sul3</i>                                     | <i>sul2, sul3</i>                                     | <i>sul1, sul2, sul3</i>                                            |
| <b>Lincosamide</b>                 | -                                                                            | -                                                         | -                                                     | -                                                     | <i>inuF</i>                                                        |
| <b>-lactam</b>                     | CTX-M-14, TEM-1                                                              | CTX-M-14                                                  | CTX-M-14                                              | CTX-M-14, TEM-116                                     | CTX-M-55                                                           |
| <b>Colistin</b>                    | <i>mcr-1.1</i>                                                               | <i>mcr-1.1</i>                                            | <i>mcr-1.1</i>                                        | <i>mcr-1.1</i>                                        | <i>mcr-1.1</i>                                                     |
| <b>Quinones/Fluoroquinolones</b>   | Ser83Leu and Asp87Asn for GyrA, and Ser80Ile for ParC                        | Ser83Leu and Asp87Asn for GyrA, and Ser80Ile for ParC     | Ser83Leu and Asp87Asn for GyrA, and Ser80Ile for ParC | Ser83Leu and Asp87Asn for GyrA, and Ser80Ile for ParC | Ser83Leu and Asp87Asn for GyrA, and Thr56Ala and Ser80Ile for ParC |

<sup>a</sup>Both chromosomal mutations of gyrases and topoisomerase as acquired resistance genes (coverage greater than 90% identified) were determined in the Center for Genomic Epidemiology using the ResFinder tool (<http://www.genomic epidemiology.org>).

Supplementary Table S3. Phages and prophages carrying *mcr-1* identified on *E. coli* and *K. pneumoniae* genomes.

| Bacterial species    | Level    | No. de genomes (%) <sup>a</sup> | <i>mcr-1</i> positive (%) | VirSorter <sup>b</sup> |       |       |          |       |       | Genomes with prediction of intact and incomplete phages or prophages                                                                                                                  |
|----------------------|----------|---------------------------------|---------------------------|------------------------|-------|-------|----------|-------|-------|---------------------------------------------------------------------------------------------------------------------------------------------------------------------------------------|
|                      |          |                                 |                           | Cat-1                  | Cat-2 | Cat-3 | Cat-4    | Cat-5 | Cat-6 |                                                                                                                                                                                       |
|                      |          |                                 |                           | Phage                  |       |       | Prophage |       |       |                                                                                                                                                                                       |
| <i>E. coli</i>       |          |                                 |                           |                        |       |       |          |       |       |                                                                                                                                                                                       |
|                      | Complete | 689 (5)                         | 48                        | 0                      | 0     | 28    | 0        | 2     | 12    | Cat-5 (EC590 and HS30-1)                                                                                                                                                              |
|                      | Draft    | 12,868 (95)                     | 820                       | 10                     | 12    | 313   | 0        | 2     | 202   | Cat-1 (2140, 2142, 3421, A351, B146, HU4, RC2-007, XJ4, YH17180 and YH17137), Cat-2 (A200, A215, A245, A246, A276, A26, A38, A415, A6, HEB3, HLJ8 and LN48) and Cat-5 (3768 and A432) |
| Total                |          | 13,557                          | 868 (6.4)                 | 10                     | 12    | 341   | 0        | 4     | 214   |                                                                                                                                                                                       |
| <i>K. pneumoniae</i> |          |                                 |                           |                        |       |       |          |       |       |                                                                                                                                                                                       |
|                      | Complete | 306 (5)                         | 3 (1)                     | 0                      | 0     | 2     | 0        | 0     | 1     | no strains                                                                                                                                                                            |
|                      | Draft    | 6,297 (95)                      | 42 (0.7)                  | 1                      | 1     | 23    | 0        | 0     | 2     | Cat-1 (SCKP-LL83) and Cat-2 (SCKP020138)                                                                                                                                              |
| Total                |          | 6,603                           | 45 (0.7)                  | 1                      | 1     | 25    | 0        | 0     | 3     |                                                                                                                                                                                       |

<sup>a</sup>Genomes obtained from RefSeq Database at November, 2019.

<sup>b</sup>Phages and prophages identified in the *E. coli* and *K. pneumoniae* using VirSorter program [40].

Supplementary Table S4. Primers used for *mcr*- and CTX-M-type genes identification.

| Gene target  | Primer and Sequence (5' – 3')                                      | Amplicon (bp) | Reference  |
|--------------|--------------------------------------------------------------------|---------------|------------|
| <i>mcr-1</i> | CLR5-F: GGTCAGTCCGTTTGTTTC<br>CLR5-R: CTTGGTCGGTCTGTAGGG           | 309           | [8]        |
| <i>mcr-2</i> | MCR-12-F: TGGTACAGCCCCTTTATT<br>MCR-12-R: GCTTGAGATTGGGTTATGA      | 600 pb        | This study |
| <i>mcr-3</i> | mcr3-F: TTGGCACTGTATTTTGCATTT<br>mcr3-R: TTAACGAAATTGGCTGGAACA     | 542 pb        | [42]       |
| <i>mcr-4</i> | Mcr-4 FW: ATTGGGATAGTCGCCTTTTT<br>Mcr-4RV: TTACAGCCAGAATCATTATCA   | 487 pb        | [43]       |
| <i>mcr-5</i> | MCR5_fw: ATGCGGTTGTCTGCATTTATC<br>MCR5_rew: TCATTGTGGTTGTCCTTTTCTG | 1644 pb       | [44]       |
| <b>CTX-M</b> | CTX-MF: GCTGTTGTTAGGAAGTGTG<br>CTX-MR: GGTGACGATTTTAGCCGCC         | 811 bp        | [30]       |

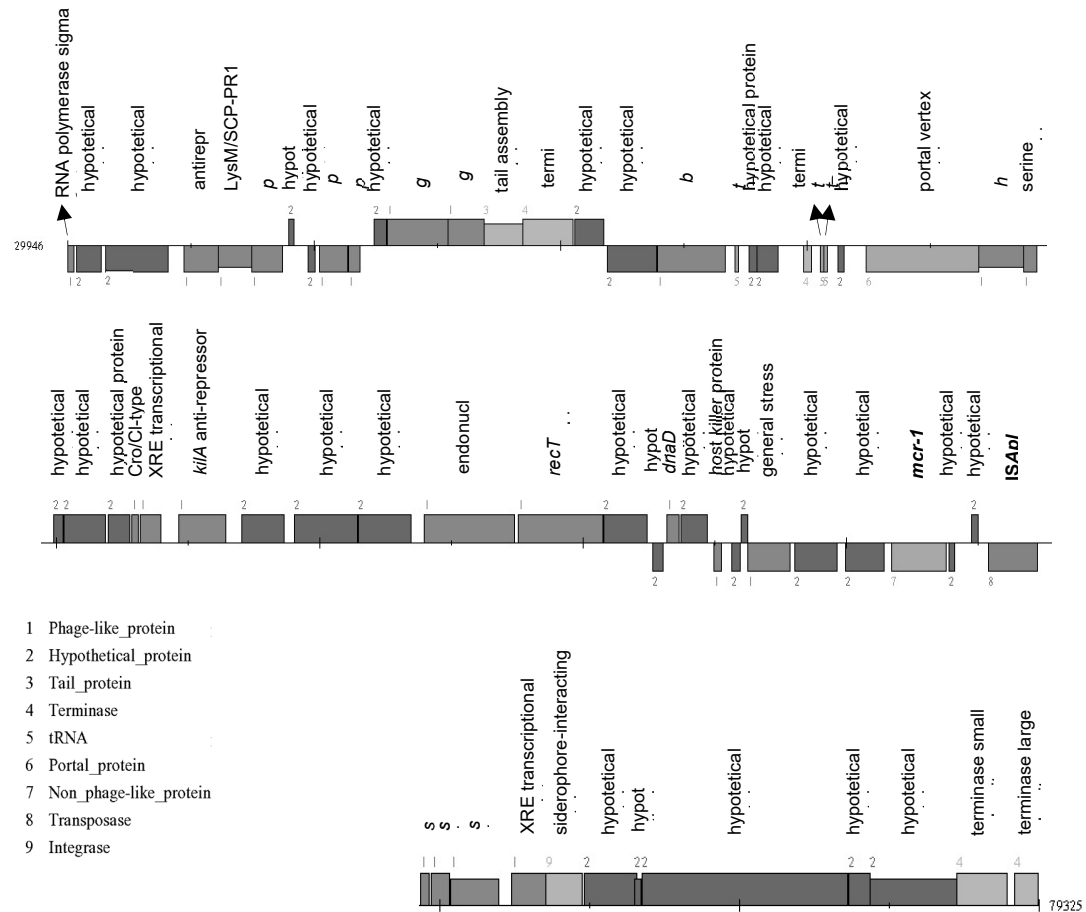

Supplementary Figure S1. Genome map of prophage as the genetic context of *mcr-1* gene. The predicted genes and the functions predicted by PHASTER program [41] are indicated as boxes with the superscript number in each box.

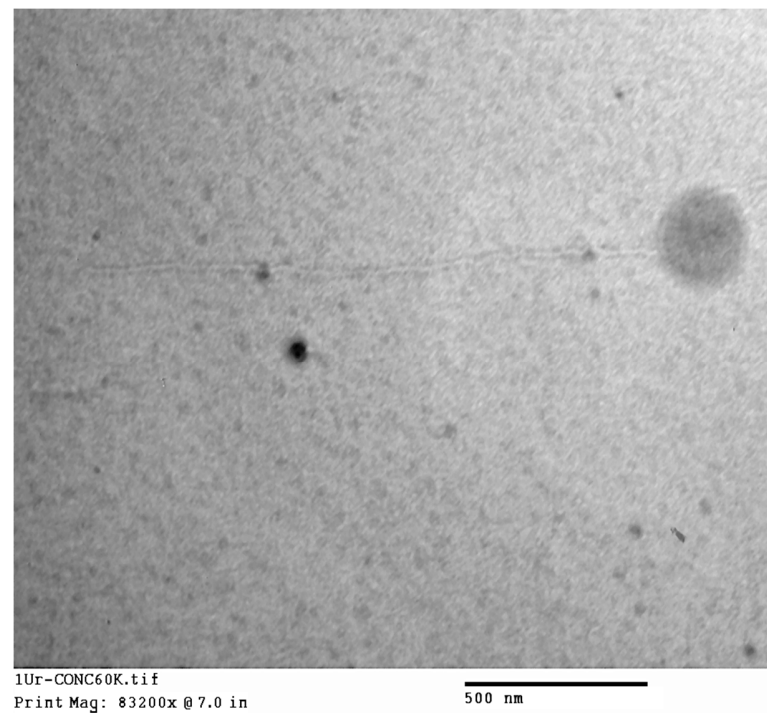

Supplementary Figure S2. Electronic microscopy of phage that contained no detectable *mcr-1* gene.

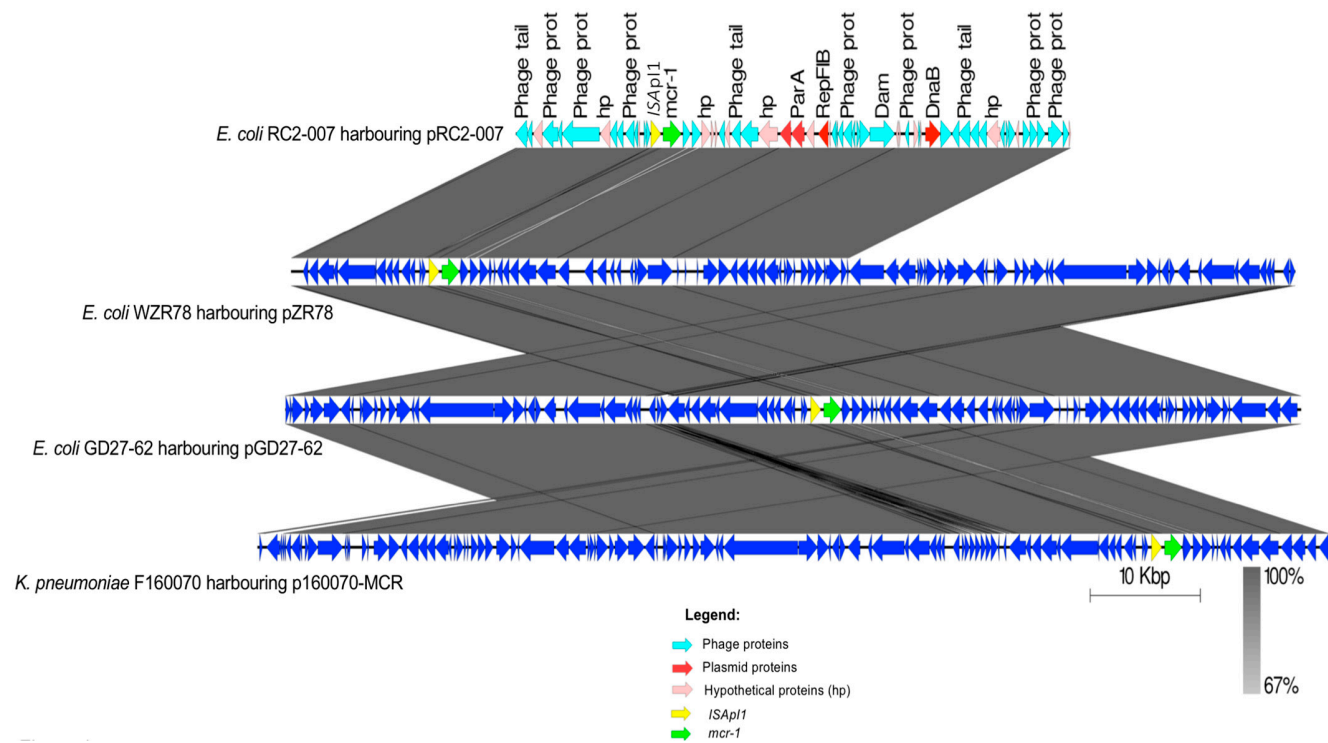

Supplementary Figure S3. Comparison of phage-like plasmid that contains the *mcr-1* gene in the pRC2-007 plasmid with other phage-like plasmids
